# Supplementary material for: Editing of human KV1.1 channel mRNAs disrupts binding of the N-terminus tip at the intracellular cavity
Source: PubMed Central journal article supplement — Nat Commun. 2011 Aug 16;2:436–. doi: 10.1038/ncomms1446 (PMC3265383; doi:10.1038/ncomms1446), 2011-08-16
Supplement: ncomms1446-s1.pdf [file ncomms1446-s1.pdf]

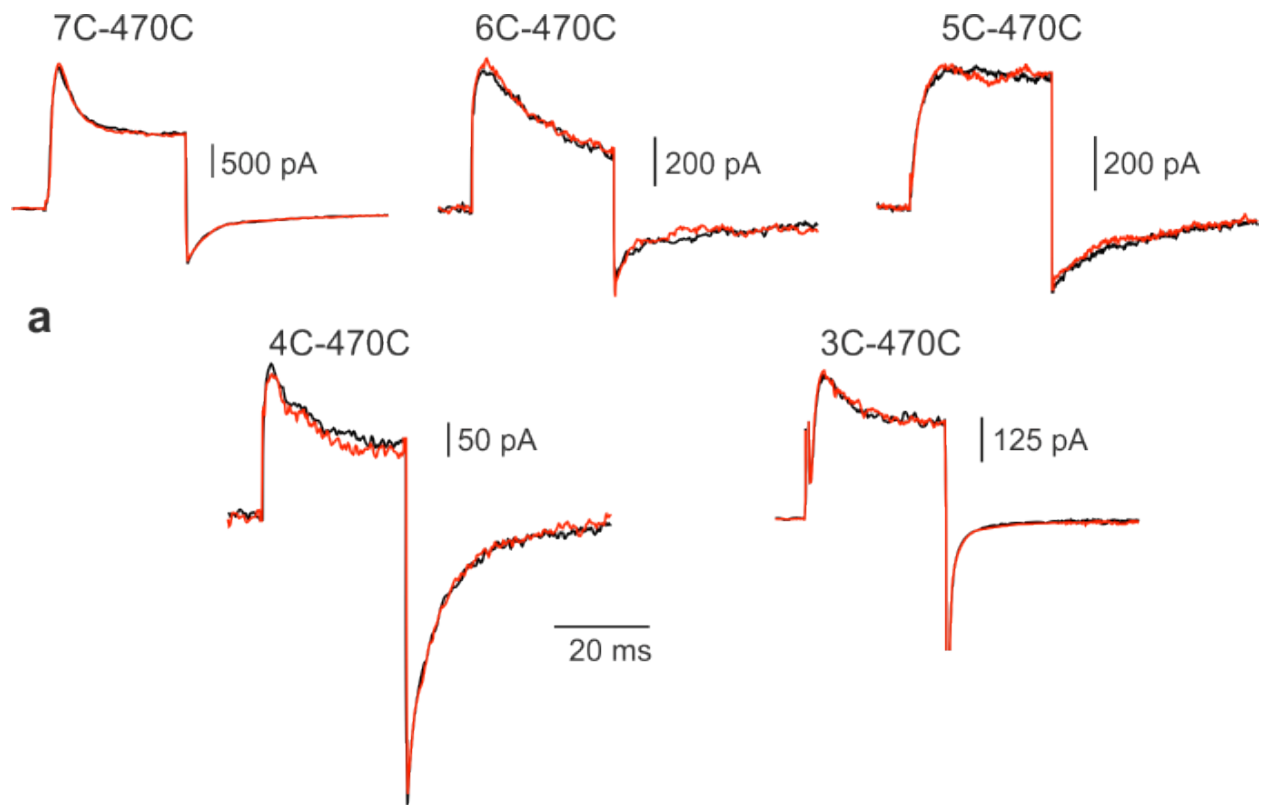

**b**

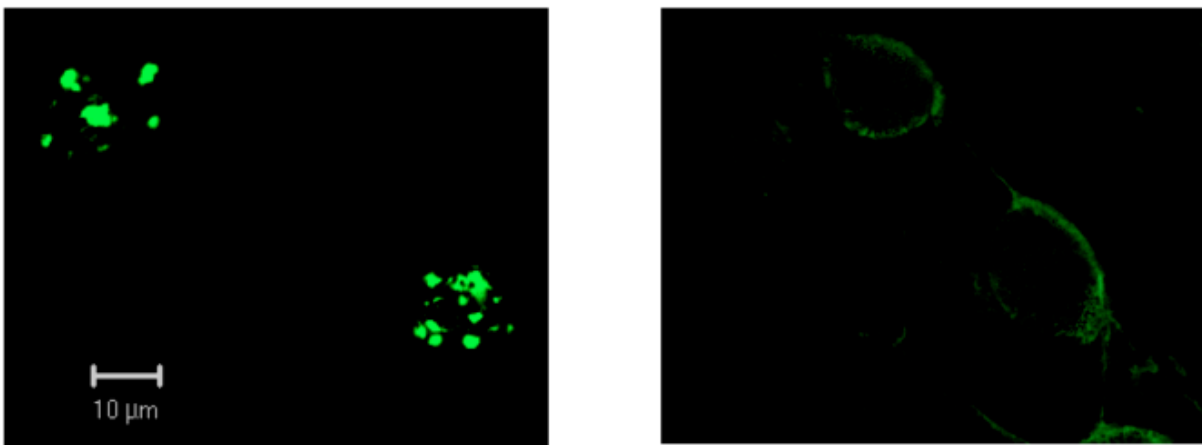

**Supplementary Figure S1** Functional properties of double cysteine mutants. (a) Current traces in response to 30 ms depolarizations to +60 mV from a holding potential of -80 mV. In each case, the two consecutive traces were recorded ~1 min after patch excision. (b) Pictures of HEK cells expressing the intracellular cysteine less WT Shaker fused at the C-terminus with GFP (right) and the 2C-470C channel fusion construct (left). Similar results were observed in four independent parallel transfections with these two constructs.

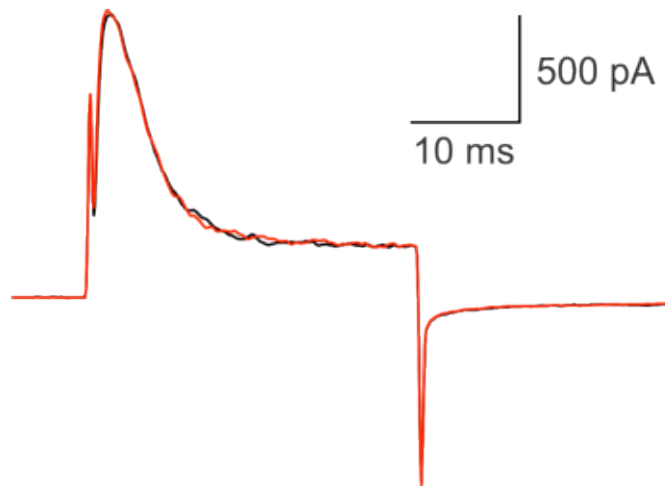

**Supplementary Figure S2** Functional properties of A2C mutant channels. The current traces shown were acquired in response to 30 ms depolarizations to +60 mV from a holding potential of -80 mV. Both current traces were recorded ~1 min after patch excision.
